# Supplementary material for: Effects of an Emotional Release Intervention Studied by Hekalogy on Serum Serotonin Concentrations: A Prospective Pre-Post Study
Source: Research Square preprint supplement (doi:10.21203/rs.3.rs-8643135/v1), 2026-01-21
Supplement: Supplementary file 1 [file 0490bea663f7a654d9490565.pdf]

**Bogotá, August 28, 2025**

(CEISH) 403-2025

Dr. Jonathan Abdiel Calderón Nava

**Principal Investigator**

Ricardo Javier Ponce Herrera

**Sub-Investigator**

City

**REF: Effects of an Emotional Release Intervention Studied by Hekalogy on Serum Serotonin Concentrations: A Prospective Pre-Post Study**

Dear Dr. Calderón, The Ethics Committee for Research with Human Subjects HSJ-FUCS (CEISH), established by Act No. 2 of September 29, 2006, is composed of ten (10) permanent members. A quorum of more than half is required for ordinary sessions, according to the current bylaws. The committee is certified by INVIMA, according to Resolution No. 2017007903 of February 27, 2017, for the development of clinical research protocols. The IPS Sociedad de Cirugía de Bogotá, Hospital de San José, is authorized by the Health Secretariat for its general operation.

The Ethics Committee for Research with Human Subjects HSJ-FUCS (CEISH) is committed to protecting and respecting the rights of participants in clinical research. To achieve this objective, the committee adheres to all legal and ethical regulations established in the country, including Resolutions 008430 of 1993 and 002378 of 2008 from the Ministry of Social Protection. Furthermore, the committee is guided by the principles and values of the Declaration of Helsinki (Fortaleza, Brazil 2013) and the World Conference on Harmonisation for Good Clinical Practice, guaranteeing the integrity and well-being of participants in health research.

Recording its deliberations in minutes 15 of August 27, 2025, and in response to your communication of August 22, 2025, this committee reviews and APPROVES the aforementioned study.

Please submit the results obtained upon completion of the study to this committee.

In compliance with Resolution 2378 of 2008, please be advised that the bylaws governing this committee, as well as the operational guidelines for its functioning, are available on the website of the University Foundation of Health Sciences for your information and application.

The following members participated in this session:

Pablo Vásquez Hoyos (President), MD, Pediatric Intensivist, Specialist in

Calle 10 No. 18 -75– Teléfono 3538100 Extensión 1332

Emails: [ceish@hospitaldesanjose.org.co](mailto:ceish@hospitaldesanjose.org.co)

[www.fucsalud.edu.co](http://www.fucsalud.edu.co) - [www.hospitaldesanjose.org.co](http://www.hospitaldesanjose.org.co)

Bogotá, Colombia

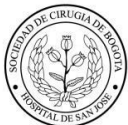

SOCIEDAD DE CIRUGÍA DE BOGOTÁ  
HOSPITAL DE SAN JOSÉ

## COMITÉ DE ÉTICA EN INVESTIGACIÓN CON SERES HUMANOS CEISH

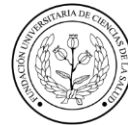

FUNDACIÓN UNIVERSITARIA  
DE CIENCIAS DE LA SALUD  
FUCS

Epidemiology; Patricia Pérez Abondano (Secretary), Clinical Psychologist; María Carolina Ayala Ramírez, BA in Modern Languages, MA in Citizenship and Human Rights, Ethics and Politics, Specialist in Bioethics, PhD Candidate in Citizenship and Human Rights; Michael A. Vallejo Urrego, MD, Specialist in Epidemiology, Specialist in Quality Management in Health, MA in Human Genetics; Luis A. Castro Pineda, Community Member; María Inés Sarmiento Medina, MD, Specialist in Epidemiology, Specialist and MA in Bioethics; Francy Licet Villamizar Gómez, Surgical Instrument Technician, Specialist and MA in Epidemiology, PhD in Education; Jean Pierre Camargo, Lawyer; Diego Alberto Caicedo, Pharmaceutical Chemist; Moisés H. Silvera, Nurse, Specialist in Bioethics.

Sincerely,

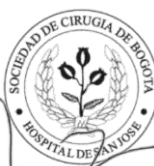

SOCIEDAD DE CIRUGÍA DE BOGOTÁ  
HOSPITAL DE SAN JOSÉ

**PABLO VÁSQUEZ HOYOS MD, MSc.**

President

Comité de Ética en Investigación  
con Seres Humanos  
(CEISH)

Prepared and Elaborated by: Diana D'Lamarck Reviewed by: Patricia Pérez

Calle 10 No. 18 -75– Teléfono 3538100 Extensión 1332

Emails: [ceish@hospitaldesanjose.org.co](mailto:ceish@hospitaldesanjose.org.co)

[www.fucsalud.edu.co](http://www.fucsalud.edu.co) - [www.hospitaldesanjose.org.co](http://www.hospitaldesanjose.org.co)

Bogotá, Colombia
